# Supplementary material for: Detection of mixed organophosphorus pesticides in real samples using quantum dots/bi-enzyme assembly multilayers
Source: Royal Society of Chemistry journal article supplement (doi:10.1039/c1jm11631b), 2011-01-01
Supplement: c1jm11631b.pdf [file c1jm11631b.pdf]

## Electronic Supplementary Information (ESI) for

# Detection of mixed organophosphorus pesticides in real samples using quantum dots/bi-enzyme assembly multilayers

Zhaozhu Zheng,<sup>a</sup> Xinyu Li,<sup>a</sup> Zhifei Dai,<sup>c</sup> Shaoqin Liu \*<sup>a</sup> and Zhiyong Tang \*<sup>b</sup>

<sup>a</sup> Key Laboratory of Microsystems and Microstructures Manufacturing, Ministry of Education, Harbin Institute of Technology, Harbin, 150080, China. E-mail: shaoqinliu@hit.edu.cn, shaoqinliu@hotmail.com; Fax: 86 451 86413483; Tel: 86 451 86413493

<sup>b</sup> Laboratory for Nanomaterials, National Center for Nanoscience and Technology, Beijing 100190, China. E-mail: zytang@nanoctr.cn; Fax: 86 10 82545580; Tel: 86 10 82545580

<sup>c</sup> Bio-X Center, Harbin Institute of Technology, Harbin, 150080, China.

**Part S1 Preparation and characterization of the proposed biosensor**

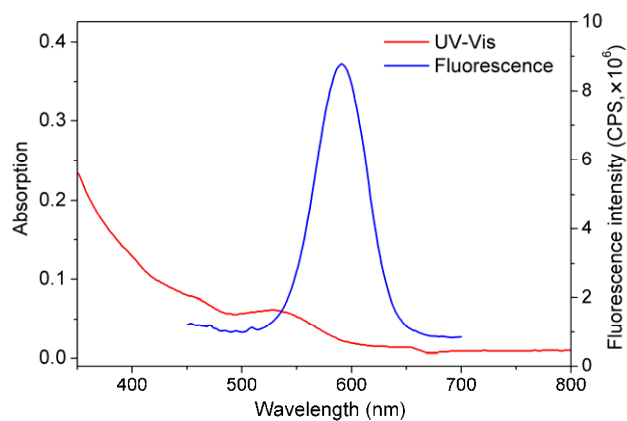

**Fig. S1** UV-vis spectra (red line) and fluorescence spectra (blue line) of (PAH/QDs)<sub>8</sub>(PAH/PSS)<sub>3</sub>(PAH/ChO<sub>x</sub>)<sub>6</sub>(PAH/AChE)<sub>3</sub> multilayer.

**Part S2 Biosensing mechanism of QDs/ChOx/AChE multilayer**

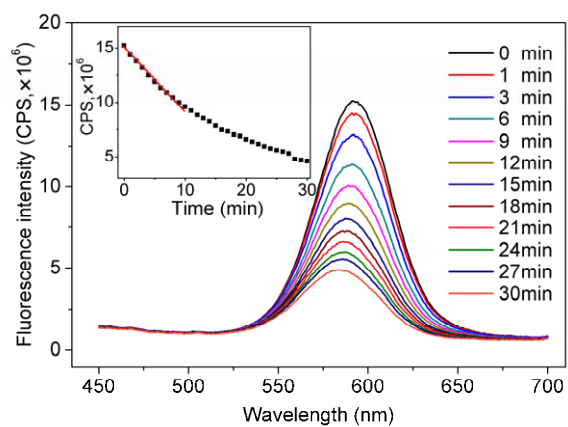

**Fig. S2** Time-dependent fluorescence changes upon the interaction of 8 bilayers of PAH/CdTe QDs in the absence and presence of 0.02 mM H<sub>2</sub>O<sub>2</sub> at room temperature.

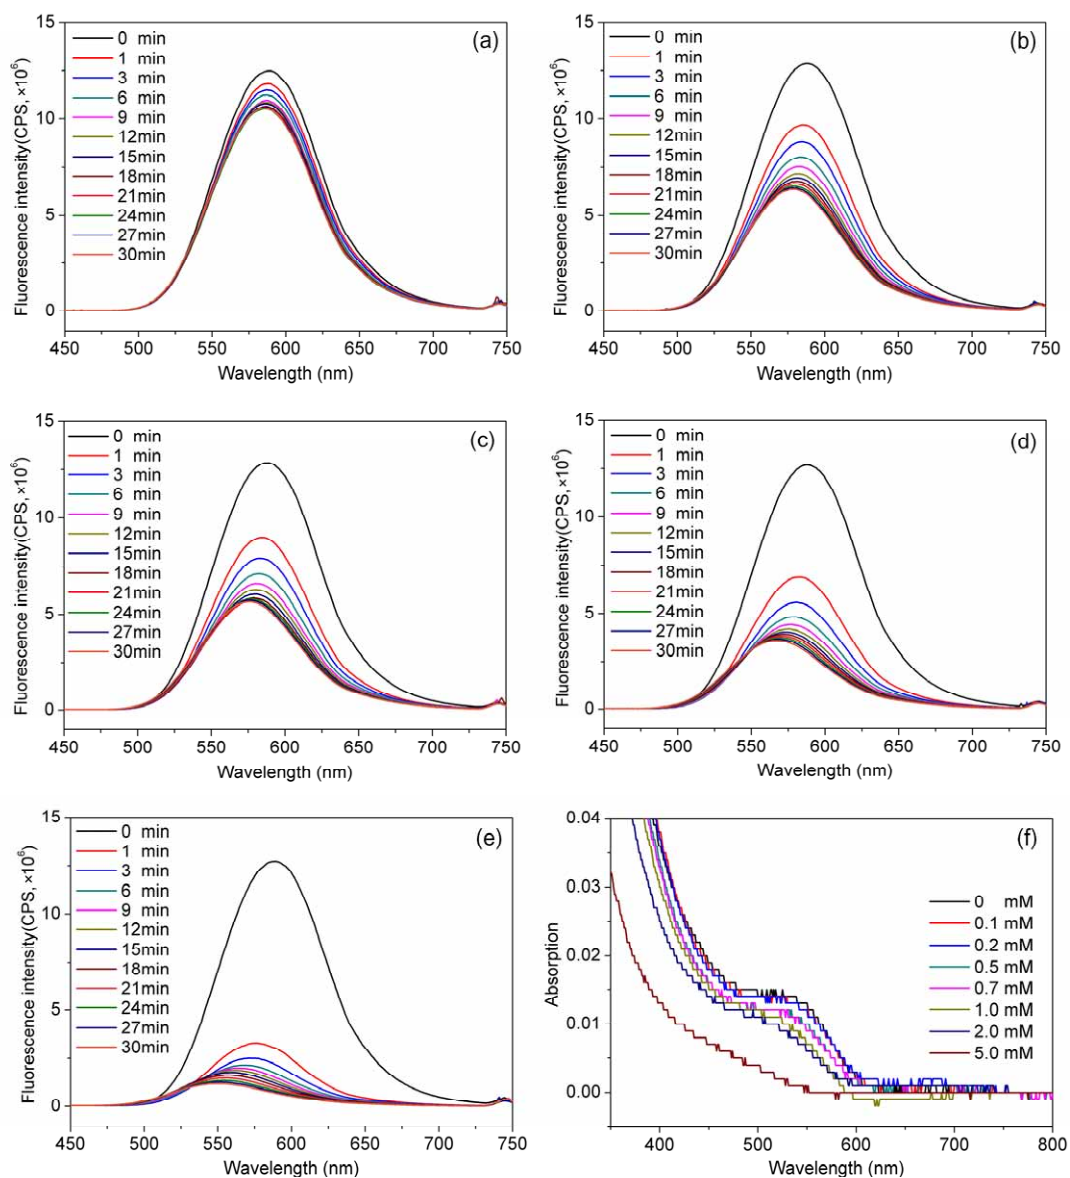

**Fig. S3** Time-dependent fluorescence changes upon the interaction of CdTe QD solution in the absence and presence of (a) 0.1 mM, (b) 0.5 mM, (c) 1.0 mM, (d) 2.0 mM, and (e) 5.0 mM H<sub>2</sub>O<sub>2</sub>. (f) UV-vis spectra of CdTe QD solution after interacting with different concentration of H<sub>2</sub>O<sub>2</sub> at room temperature. All measurements were performed in a 20 mM phosphate buffer solution, pH = 8.0. The samples were excited at 380 nm, and the exciting slit and the emission slit were both 5 nm, respectively.

### Part S3 Optimal AChE and ChOx immobilizing conditions

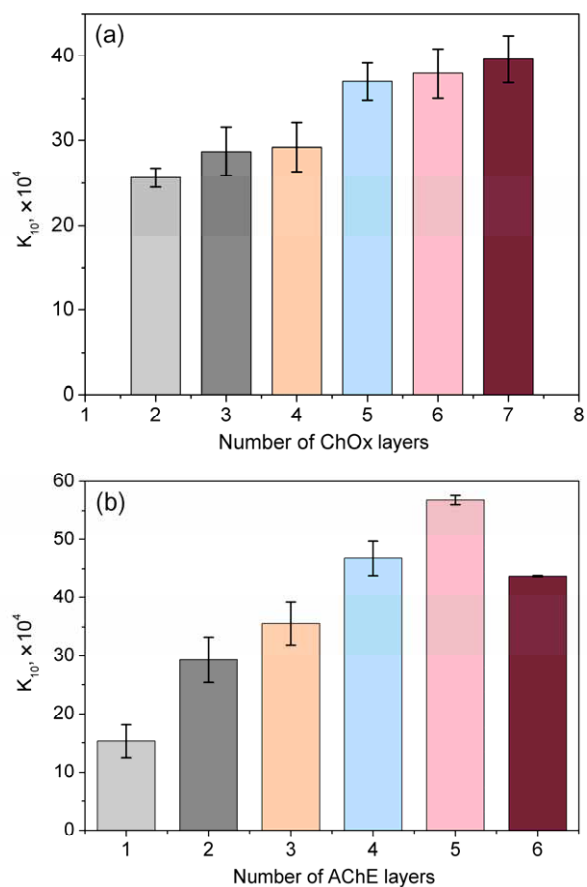

**Fig. S4** (a) Absolute quenching rate of the fluorescence intensity at 592 nm within 10 min as a function of number of ChOx layers. All measurements were performed in a 20 mM phosphate buffer solution, pH = 8.0, and 4 mM choline. (b) Absolute quenching rate of the fluorescence intensity at 592 nm within 10 min as a function of number of AChE layers on the top of  $(\text{PAH/QDs})_8(\text{PAH/PSS})_3(\text{PAH/ChOx})_6$ . All measurements were performed in a 20 mM phosphate buffer solution, pH = 8.0, and 2 mM acetylcholine.

#### Part S4 Stability of the proposed biosensor

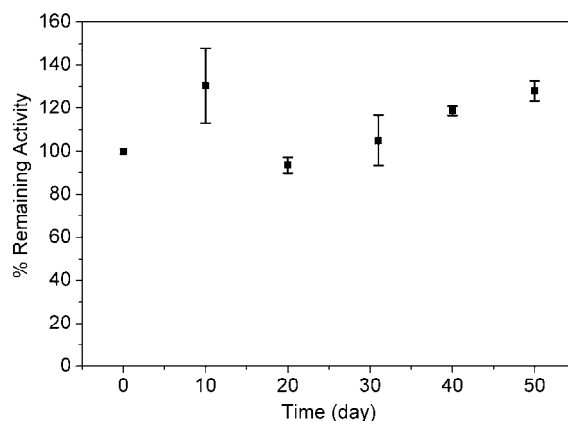

Fig. S5 Stability of the biosensor.

Immobilization of AChE into polyelectrolyte multilayer can effectively stabilize enzymes against unfolding forces. This effect can be observed by testing the long term stability of the sensors. A stock of  $(\text{PAH}/\text{CdTe})_8(\text{PAH}/\text{PSS})_3(\text{PAH}/\text{ChOx})_3(\text{PAH}/\text{AChE})_3$  multilayers were prepared and stored at  $-20\text{ }^\circ\text{C}$ . At certain time intervals, the samples were taken out and the remaining activity of enzyme was analyzed under the optimal conditions. Remain enzyme activity (%) is determined from the below equation:

$$\text{Remain enzyme activity (\%)} = K_{10 \text{ stored}}/K_{10 \text{ freshly}} \times 100\% \quad (\text{S1})$$

Where,  $K_{10 \text{ stored}}$  and  $K_{10 \text{ freshly}}$  are the absolute quenching rate of the biosensor stored for defined time and the freshly prepared biosensor, respectively. As shown in Fig. S5, all the immobilized enzymes into polyelectrolyte multilayers remained their bioactivity and the response of the biosensor decreased by only 10% compared with the initial response after 1 month of storage. An even slight increase of the AChE activity at the initiate storage might be attributed to the changes of the enzyme's three-dimensional structure inside multilayers, which were already observed in other biosensor systems. So it is safely concluded that polyelectrolyte multilayer provides an efficient micro-environment for enzyme stabilization, which will benefit the applications of many types of biosensors.

**Part S5 Comparing the performance of the proposed biosensor with other AChE-based sensors**

**Table S1** Comparison of the proposed biosensor and other AChE-based sensors for LOD.

| Sensor(enzyme) <sup>a</sup>                                                | Signal substrate                                                     | Transduction technology           | Application<br>(analyte/detection<br>limit)                   | Ref.              |
|----------------------------------------------------------------------------|----------------------------------------------------------------------|-----------------------------------|---------------------------------------------------------------|-------------------|
| ChOx (A. sp.) and AChE (E. eel) immobilized on electrode                   | H <sub>2</sub> O <sub>2</sub>                                        | electrochemical                   | aldicarb:<br>60 pM                                            | 2002 <sup>1</sup> |
| AChE (hs) immobilized in sol-gel                                           | bromocresol purple                                                   | absorption<br>spectra/fiber-optic | dichlorvos:<br>23.53 nM                                       | 2002 <sup>2</sup> |
| Free AChE (E. eel)                                                         | 2-butyl-6-(4-methyl-piperazin-1-yl)-benzo[de]isoquinoline-1,3-dione) | fluorescence                      | dichlorvos:<br>113.13 nM,<br>paraoxon:<br>43.60 nM            | 2004 <sup>3</sup> |
| AChE (E. eel) modified thick film strip electrode                          | thiocholine                                                          | electrochemical                   | paraoxon:<br>0.5 nM                                           | 2005 <sup>4</sup> |
| AChE (D. m) immobilized in liposome                                        | pyranine                                                             | fluorescence                      | dichlorvos:<br>0.20 nM (I25)<br>paraoxon:<br>0.67 nM (I25)    | 2007 <sup>5</sup> |
| AChE (E. eel) immobilized on electrode                                     | thiocholine                                                          | electrochemical                   | paraoxon:<br>0.1 nM                                           | 2010 <sup>6</sup> |
| AChE (E. eel) immobilized on electrode                                     | thiocholine                                                          | electrochemical                   | dichlorvos:<br>11.31 pM                                       | 2010 <sup>7</sup> |
| Mutants AChE (N. b) on gold disposable electrochemical printed (DEP) chips | thiocholine                                                          | electrochemical                   | paraoxon:<br>36 nM (I20)                                      | 2010 <sup>8</sup> |
| AChE (E. eel) and ChOx (A. sp.) multilayers on glass                       | H <sub>2</sub> O <sub>2</sub>                                        | fluorescence                      | Paraoxon:2.75 pM<br>Dichlorvos: 2.09 pM<br>Parathion: 4.82 pM | This work         |

<sup>a</sup> AChE (E. eel) is AChE from *Electrophorus electricus*. AChE (hs) is AChE from horse serum. AChE (D. m) is AChE from *Drosophila melanogaster*. Mutants AChE (N. b) is AChE from *Nippostrongylus brasiliensis*. ChOx (A. sp.) is ChOx from *Alcaligenes sp.*.

Supplementary Material (ESI) for Journal of Materials Chemistry  
This journal is © The Royal Society of Chemistry 2011

**Table S2** Comparison of this study and other AChE-based sensors for detecting real samples.

| Sensor (enzyme) <sup>a</sup>                                  | Signal<br>molecular   | Readout<br>(technology)                                           | Application (analyte) <sup>b</sup>                                                                     | Recovery (%)                                                    | Ref.               |
|---------------------------------------------------------------|-----------------------|-------------------------------------------------------------------|--------------------------------------------------------------------------------------------------------|-----------------------------------------------------------------|--------------------|
| AChE (E. eel)<br>immobilized on<br>electrode                  | thiocholine           | electrochemical                                                   | carbaryl in peach (5 ppm),<br>orange (7 ppm), carrot (0.5<br>ppm); propoxur in sweet pepper<br>(3 ppm) | 109 ± 4.0<br>116 ± 8.7<br>125 ± 2.3<br>122 ± 10.4               | 1999 <sup>9</sup>  |
| AChE (be)<br>immobilized on<br>polyurethane<br>foam           | DTNB                  | thermal lens<br>spectrometry/<br>flow-injection<br>analysis (FIA) | paraoxon in tap water (10 ppm),<br>orange juice (10 ppm), apple<br>juice(10 ppm)                       | 76 ± 0.08<br>60 ± 0.1<br>51 ± 0.05                              | 1999 <sup>10</sup> |
| AChE (E. eel)<br>immobilized on<br>electrode                  | thiocholine           | electrochemical                                                   | paraoxon in infant food (5 ppm)                                                                        | 104%                                                            | 2002 <sup>11</sup> |
| AChE (hs)<br>immobilized in<br>sol-gel                        | bromocresol<br>purple | absorption spectra/<br>fiber-optic                                | dichlorvos in ground water (10<br>ppb); No data for fruits or<br>vegetables                            | 91.5 ± 3.8                                                      | 2002 <sup>2</sup>  |
| AChE (D. m)<br>immobilized in<br>liposome                     | pyranine              | fluorescence                                                      | dichlorvos in water (0.221 ppb);<br>No data for fruits or vegetables                                   | detection limit                                                 | 2007 <sup>5</sup>  |
| AChE (bs)<br>immobilized on<br>filter paper                   | DTNB                  | colorchange/<br>naked eyed                                        | diazinon oxon in apple juice (0.1<br>ppm) (extracted with hexane)                                      | detection limit                                                 | 2007 <sup>12</sup> |
| AChE (E. eel)<br>and ChOx (A.<br>sp.) multilayers<br>on glass | QDs                   | fluorescence                                                      | dichlorvos in apple (22 ppb, 2.2<br>ppb); paraoxon in apple (22.67<br>ppb, 2.27 ppb)                   | 105.78 ± 2.08<br>106.52 ± 4.01<br>97.77 ± 6.67<br>103.01 ± 9.58 | This work          |

<sup>a</sup> DTNB is abbreviation of 5,5'-dithio-bis(2-nitrobenzoic acid). AChE (E. eel) is AChE from *Electrophorus electricus*. AChE (be) is AChE from bovine erythrocytes. AChE (hs) is AChE from horse serum. AChE (D. m) is AChE from *Drosophila melanogaster*. AChE (bs) is AChE from bovine serum. ChOx (A. sp.) is ChOx from *Alcaligenes sp.*.

<sup>b</sup> ppm: mg·L<sup>-1</sup>, ppb: µg·L<sup>-1</sup>, ppt: ng·L<sup>-1</sup>.



## References

- 1 F. N. Kok, F. Bozoglu and V. Hasirci, *Biosens. Bioelectron.*, 2002, **17**, 531-539.
- 2 V. G. Andreou and Y. D. Clonis, *Biosens. Bioelectron.*, 2002, **17**, 61-69.
- 3 S. Y. Jin, Z. C. Xu, J. P. Chen, X. M. Liang, Y. N. Wu and X. H. Qian, *Anal. Chim. Acta*, 2004, **523**, 117-123.
- 4 K. A. Joshi, J. Tang, R. Haddon, J. Wang, W. Chen and A. Mulchandani, *Electroanal.*, 2005, **17**, 54-58.
- 5 V. Vamvakaki and N. A. Chaniotakis, *Biosens. Bioelectron.*, 2007, **22**, 2848-2853.
- 6 N. Jha and S. Ramaprabhu, *Nanoscale*, 2010, **2**, 806-810.
- 7 X. Sun and X. Y. Wang, *Biosens. Bioelectron.*, 2010, **25**, 2611-2614.
- 8 V. Dounin, A. J. Veloso, H. Schulze, T. T. Bachmann and K. Kerman, *Anal. Chim. Acta*, 2010, **669**, 63-67.
- 9 G. S. Nunes, D. Barcelo, B. S. Grabaric, J. M. Diaz-Cruz and M. L. Ribeiro, *Anal. Chim. Acta*, 1999, **399**, 37-49.
- 10 L. Pogacnik and M. Franko, *Biosens. Bioelectron.*, 1999, **14**, 569-578.
- 11 H. Schulze, E. Scherbaum, M. Anastassiades, S. Vorlova, R. D. Schmid and T. T. Bachmann, *Biosens. Bioelectron.*, 2002, **17**, 1095-1105.
- 12 N. Nagatani, A. Takeuchi, M. A. Hossain, T. Yuhi, T. Endo, K. Kerman, Y. Takamura and E. Tamiya, *Food Control*, 2007, **18**, 914-920.
